# Supplementary material
Source: PubMed Central journal article supplement (PMC4350020)
Supplement: NIHMS664443-supplement.pdf [file NIHMS664443-supplement.pdf]

## Supplemental Figures and Legends

**A**

| tissue  | lncRNAs (FANTOM3 ID)                                                                                                                                                               |
|---------|------------------------------------------------------------------------------------------------------------------------------------------------------------------------------------|
| adipose | 2310042I22, 2310079P10, 6030475M24, 8030489O15, 9030024J15, B230114P17                                                                                                             |
| liver   | 0610005C13, 1700058M13, 1700063J08, 9030024J15, 9130016M20, 9130221J18, 9230101F19, A430069H15, B230114P17, C730010C06, C730016I12, C730036E19                                     |
| muscle  | 1110002E14, 1110002E22, 1110020A10, 1110058D09, 2310014F07, 2310040G24, 2310045N14, 2310050B05, 2310058C22, 2310079P10, 6030406G17, A030001D16, B230318C15, D330025O06, D830041H11 |

**B**

|                | Lung     | Spleen    | Liver   | Hippocampus | Heart      | Thymus    |
|----------------|----------|-----------|---------|-------------|------------|-----------|
| lncLSTR (lnc3) | 0.035688 | 0.11324   | 10.6448 | 0.002875    | 0.140623   | 0.028571  |
| lnc1           | 0        | 0.0848163 | 98.1886 | 0.363708    | 0          | 0         |
| lnc2           | 0.155021 | 0.471838  | 85.0819 | 0.0364536   | 0.00309765 | 0.0790134 |
| GAPDH          | 46.1039  | 64.1728   | 72.9469 | 184.485     | 343.618    | 121.635   |

**C**

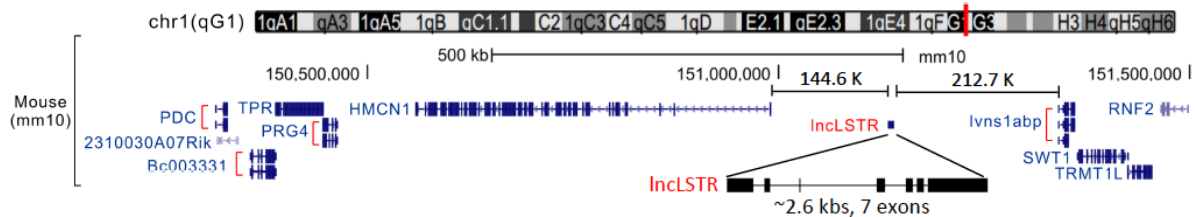

**Figure S1, related to Figure 1. *LncRNAs identified in mouse metabolic tissues.*** (A) A list of lncRNAs that are enriched in liver, muscle and adipose tissues. (B) A RNA-seq dataset of multiple tissues (Keane et al., 2011) was analyzed to calculate the mean Fragments Per Kilobase of transcript per Million (FPKM) for three liver-enriched lncRNAs as shown in Figure 1A. (C) Genomic region of lncLSTR showing its neighboring genes and genomic structure of lncLSTR.

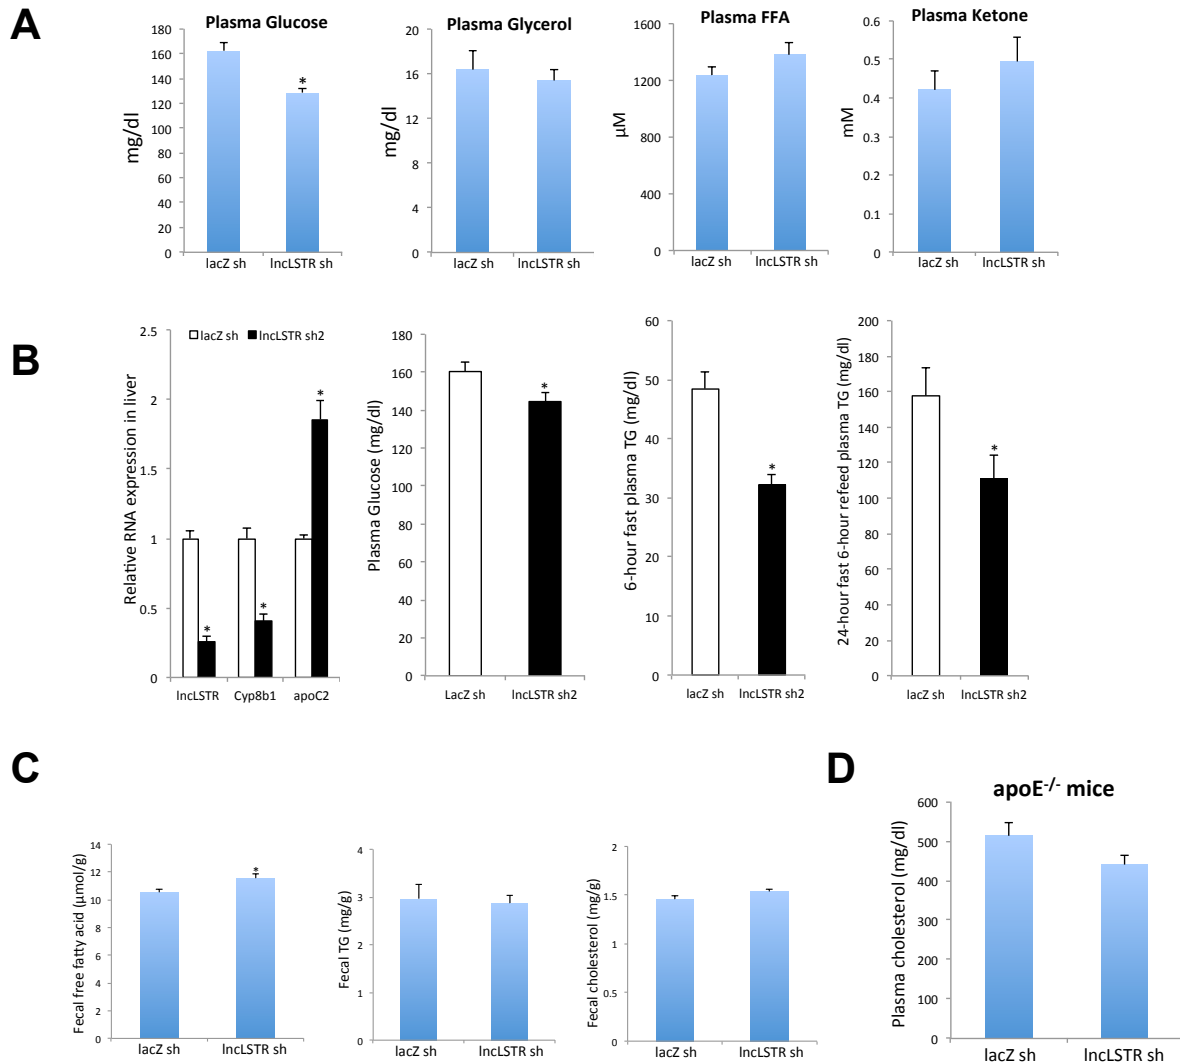

**Figure S2, related to Figure 2. Metabolic profile in control and lncLSTR KD mice.** (A) Plasma glucose, glycerol, free fatty acid (FFA) and ketone levels in control and lncLSTR KD mice after a 6-hour food withdrawal (n=7). (B) Hepatic gene expression (n=6), plasma glucose and TG levels after a 6-hour food withdrawal or plasma TG levels after fasted for 24 hours followed by a 4-hour refeed in control and lncLSTR sh2 KD mice (n=7). (C) Fecal free fatty acid, TG and cholesterol levels in control and lncLSTR KD mice were quantified using a colorimetric assay system (n=10) after 100mg dried feces from individually housed mice were incubated in 1ml 70% ethanol at 50°C for two hours. (D) Total plasma cholesterol levels in control (n=8) and lncLSTR KD (n=6) ApoE<sup>-/-</sup> mice were quantified using a colorimetric assay system. Error bars represent SEM, \*p<0.05.

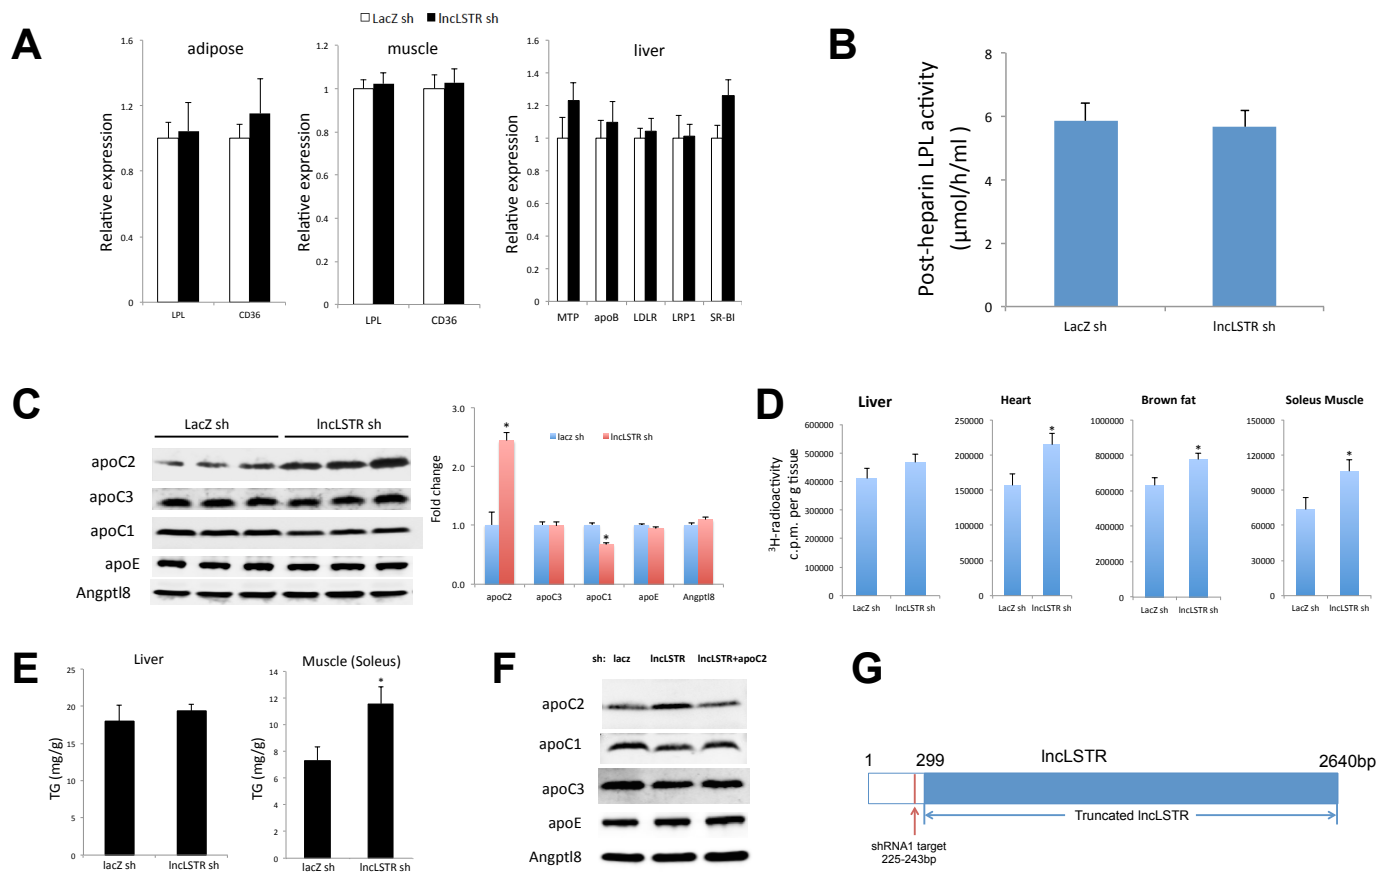

**Figure S3, related to Figure 3. Enhanced apoC2 expression and peripheral TG uptake in *IncLSTR* KD mice.** (A) Gene expression levels in adipose, muscle or liver tissues of control (lacZ sh) (n=6) and *IncLSTR* KD (*IncLSTR* sh) mice (n=5) after a 6-hour food withdrawal. (B) Post-heparin LPL activities in control and *IncLSTR* KD mice were measured as released free fatty acid from purified human VLDL (n=5). (C) Levels of apoC2, apoC3, apoC1, apoE and Angptl8 in plasma samples from individual mouse in control and *IncLSTR* KD group were analyzed by immunoblotting, with quantitative analysis on the right. (D)  $^3\text{H}$ -radioactivities derived from triolein were analyzed in liver, heart, brown fat and soleus muscle from control and *IncLSTR* KD mice 2 hours after a gavage of 100 $\mu\text{l}$  olive oil with 10 $\mu\text{Ci}$  per mouse of  $^3\text{H}$ -triolein (n=6). (E) Total TG in the liver (n=6) and soleus muscle (n=8) of *IncLSTR* KD or control mice was quantified using a colorimetric assay system. (F) Levels of apoC2, apoC3, apoC1, apoE and Angptl8 in plasma pooled from 5-6 mice of each group (control, *IncLSTR* KD or *IncLSTR* and apoC2 double KD mice) were analyzed by immunoblotting. (G) A cartoon showing full length and truncated *IncLSTR* and the site of the shRNA target sequence. Error bars represent SEM, \*p<0.05.

|                |               |
|----------------|---------------|
| InclSTR        | Slc10a1       |
| InclSTR        | Mbl2          |
| InclSTR        | Amdhd1        |
| InclSTR        | Slco1b2       |
| InclSTR        | Rdh7          |
| InclSTR        | F9            |
| InclSTR        | Cyp2a12       |
| InclSTR        | Cyp2d13       |
| InclSTR        | Slc27a5       |
| InclSTR        | Fgl1          |
| InclSTR        | Cyp2c37       |
| InclSTR        | Ugt2b1        |
| InclSTR        | Tat           |
| InclSTR        | Akr1c6        |
| <b>InclSTR</b> | <b>Cyp8b1</b> |
| InclSTR        | Hao1          |
| InclSTR        | Klkb1         |
| InclSTR        | Cpn2          |
| InclSTR        | Crp           |
| InclSTR        | Es1           |
| InclSTR        | Cfhr1         |
| InclSTR        | Ugt2a3        |
| InclSTR        | Cml2          |
| InclSTR        | 1300002K09Rik |

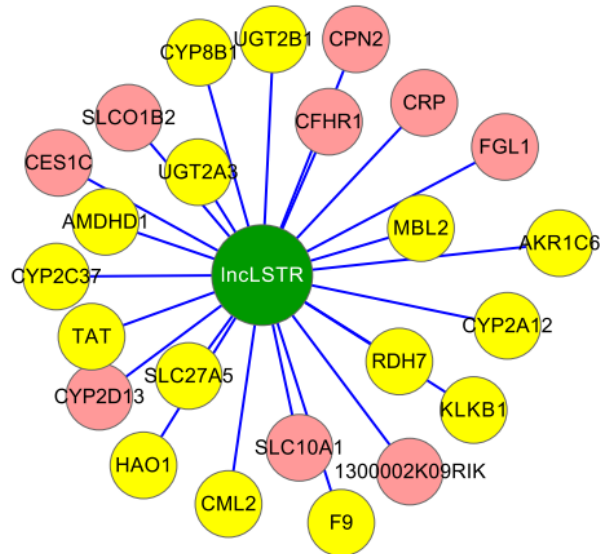

**Figure S4, related to Figure 4.** A list of genes whose expressions are correlated with *lncLSTR*. Genes with expression correlating with *lncLSTR* were identified by analyzing gene expression of 2425 samples profiled with Affymetrix Mouse Genome 430 2.0 Array that were deposited in NCBI GEO database. *lncLSTR* subnetwork consists of *lncLSTR* (green, center) and its 24 direct neighbors. Genes colored in yellow are known to play a role in metabolic pathways, pink denotes other functions.

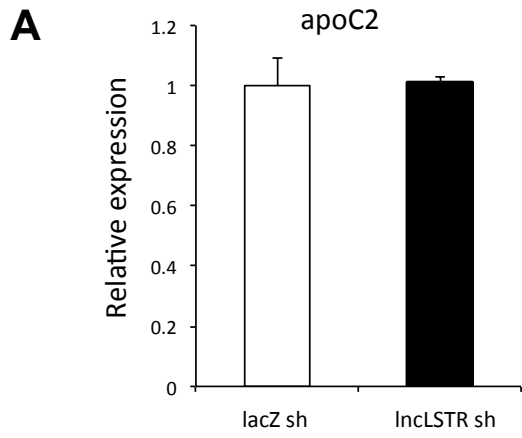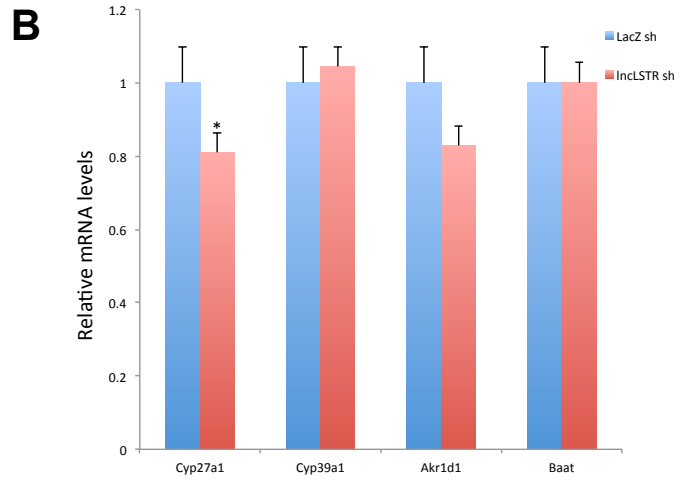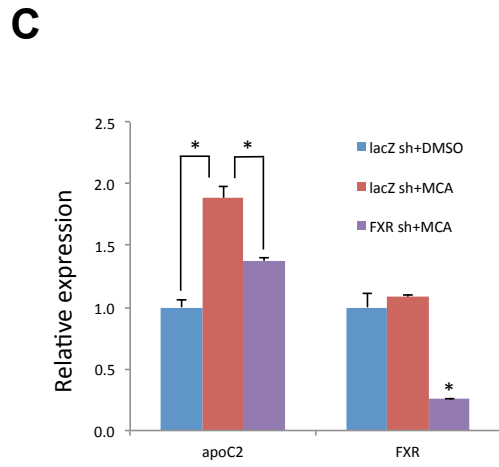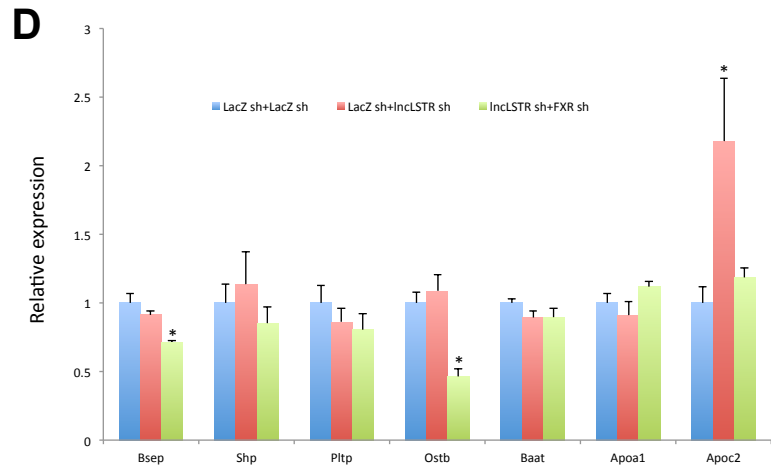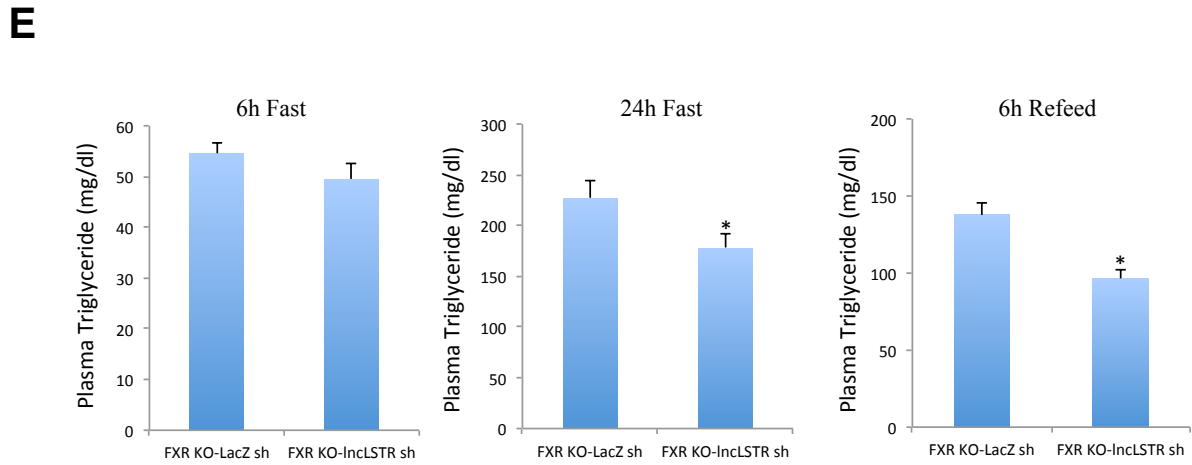

**F**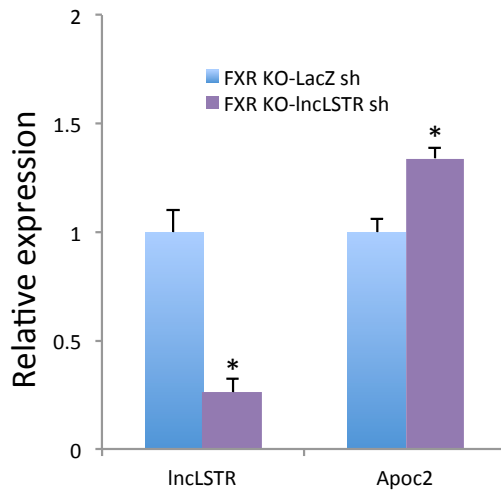**G**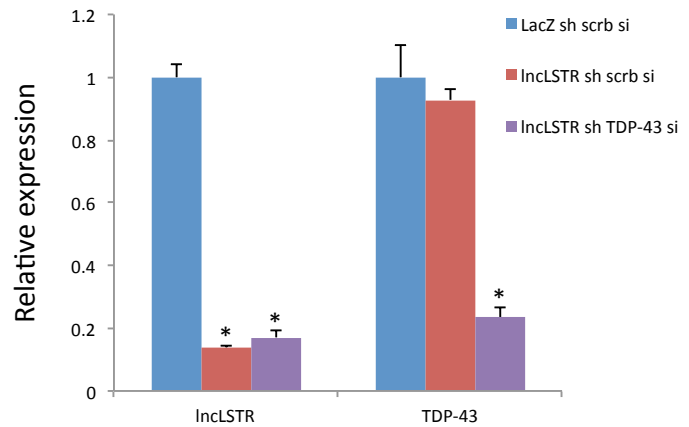

**Figure S5, related to Figure 4. Regulation of lipid metabolism by lncLSTR in mice is bile acid and FXR dependent.** (A) ApoC2 expression levels in primary hepatocytes infected with control or lncLSTR KD adenoviruses. (B) Expression levels of genes involved in bile synthesis in liver tissues from control and lncLSTR KD mice (n=6) were analyzed by real-time PCR. (C) ApoC2 expression in cultured AML12 hepatocytes infected with lacZ or FXR shRNA adenoviruses and treated with DMSO control or MCA. (D) Hepatic expressions of FXR target genes in mice receiving control, lncLSTR KD, or both FXR and lncLSTR KD adenoviruses (n=5). (E) lncLSTR was knocked down in FXR null mice and plasma TG levels were measured in lncLSTR KD (FXR KO-lncLSTR sh) and control (FXR KO-LacZ sh) mice (n=8) after a 6-hour fast (6h Fast), a 24-hour fast (24h Fast), or 6-hour refeeding after a 24-hour fast (6h Refeed). (F) Expression levels of lncLSTR and apoC2 in the livers of FXR null mice received shRNA adenoviruses for LacZ (FXR KO-LacZ sh) and lncLSTR (FXR KO-lncLSTR sh) respectively (n=8). (G) Gene expression in primary hepatocytes receiving lacZ shRNA, lncLSTR shRNA, scramble siRNA (scrb si) or TDP-43 siRNA in combination as indicated. Error bars represent SEM, \*p<0.05.

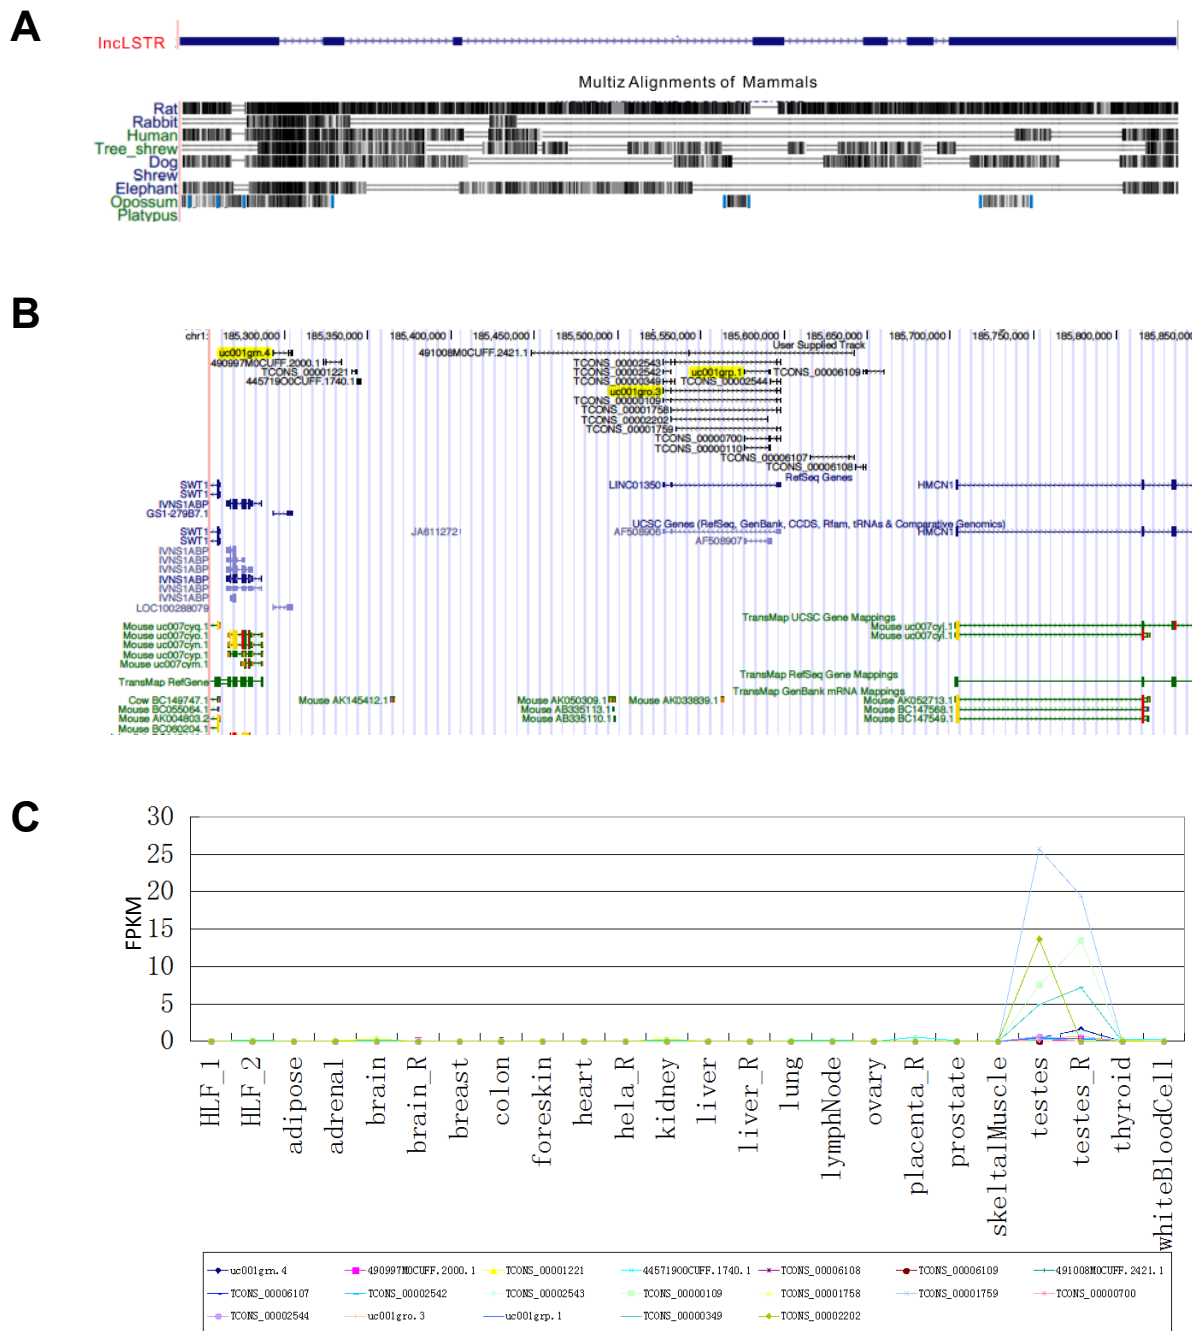

**Figure S6, related to Discussion.** *Bioinformatic analysis of potential transcripts from the IncLSTR syntenic region in human genome.* (A) Multiple sequence alignment of IncLSTR genomic sequence within major mammalian species. (B) 19 potential transcripts were identified in the human syntenic locus of IncLSTR by transcriptome reconstruction of each sample from two RNA-seq databases (ERP000546 in ArrayExpress and GSE36552 in GEO) for multiple human tissues and cells using Cufflinks. (C) Expression levels (FPKM) of the 19 transcripts were quantified across 16 human tissues and 8 cell lines from Human Body Map 2 project (ERP000546 in ArrayExpress) using Cufflinks.

## Supplemental Table

**Table S1, related to Experimental Procedures.** A list of real-time PCR primers used.

| Gene    | Forward Primer             | Reverse Primer           |
|---------|----------------------------|--------------------------|
| IncLSTR | TGTAGGAGCCCGCAATGAA        | CAACTTAAAGCTGCCCCATCA    |
| apoC2   | ATGGGGTCTCGGTTCTTCCT       | GTCTTCTGGTACAGGTCTTTGG   |
| apoC3   | GCATCTGCCCGAGCTGAAGAG      | CTGAAGTGATTGTCCATCCAGC   |
| Angptl3 | TCTACTGTGATACCCAATCAGGC    | CATGTTTCGTTGAAGTCCTGTGA  |
| Cyp8b1  | CCTCTGGACAAGGGTTTTGTG      | GCACCGTGAAGACATCCCC      |
| Cyp7a1  | GGGATTGCTGTGGTAGTGAGC      | GGTATGGAATCAACCGTTGTGTC  |
| FXR     | TCCGGACATTCAACCATCAC       | TCACTGCACATCCCAGATCTC    |
| LPL     | GGGAGTTTGGCTCCAGAGTTT      | TGTGTCTTCAGGGGTCTTAG     |
| CD36    | ATGGGCTGTGATCGGAACTG       | GTCTTCCAATAAGCATGTCTCC   |
| MTP     | AGGTTCTCTATGCCTGTGGCTTT    | TCTTAGCTTCCACCACTGCCTTGA |
| apoB    | CGTGGGCTCCAGCATTCTA        | TCACCAGTCATTTCTGCCTTTG   |
| LDLR    | TGACTCAGACGAACAAGGCTG      | ATCTAGGCAATCTCGGTCTCC    |
| LRP1    | ACTATGGATGCCCTAAAACCTTG    | GCAATCTCTTTCACCGTCACA    |
| SR-BI   | TTTGGAGTGGTAGTAAAAGGGC     | TGACATCAGGGACTCAGAGTAG   |
| Shp     | TGGGTCCCAAGGAGTATGC        | GCTCCAAGACTTACACAGTG     |
| Bsep    | AAGCTACATCTGCCTTAGACACAGAA | CAATACAGGTCCGACCCTCTCT   |
| Cyp27a1 | GCCTCACCTATGGGATCTTCA      | TCAAAGCCTGACGCAGATG      |
| Cyp39a1 | TGCACTGCATGAGCGACTG        | GGTATTGAGTGTGGCTGGATAAA  |
| Akr1d1  | TGCACACCACCAATATCCCT       | CTTCACTGCCACATAGGTCTTC   |
| Baat    | TGTGATGAATAGCCCCTACCA      | AGGACTGACGACTATGTCTTGTA  |
| Pltp    | CGCAAAGGGCCACTTTTACTA      | GCCCCATCATATAAGAACCAG    |
| apoA1   | CAGGAGATGAAAAGGACCTAG      | GCAGCTCTGCAGCTTCTGGCG    |
| Ostb    | AGATGCGGCTCCTTGAATTA       | TGGCTGCTTCTTTCGATTTCTG   |
| TDP-43  | GCCCTAGCGCCATTTTGTG        | GAAGCACAAGGAGGAAGCAC     |
| Actin   | GGCTGTATTCCCCTCCATCG       | CCAGTTGGTAACAATGCCATGT   |
| Gapdh   | AGGTCGGTGTGAACGGATTTG      | GGGGTCGTTGATGGCAACA      |
| 18S     | AGTCCCTGCCCTTTGTACACA      | CGATCCGAGGGCCTCACTA      |



## Supplemental Experimental Procedures

### Animal experiments

All animal experiments were performed in accordance and with approval from the NHLBI Animal Care and Use Committee. Male C57BL/6 (B6) mice were purchased from Jackson Laboratory at 8 weeks of age, and housed 3-5 mice per cage with free access to water and normal chow diet (NIH-31), and animals were acclimatized to the housing for 10-14 days before experiments. Groups of co-housed mice were randomly assigned to experimental groups with age and weight in accordance between groups. Animal data were excluded from experiments based on pre-established criteria of visible abnormal liver structure during sample harvest or other health issues including fighting wounds. According to the variability of metabolic parameters, group size was determined based on previous studies using similar assays within the laboratory and pilot experiments. Experimenters were not blinded to treatment group. For the fasting and refeeding study, mice were either allowed free access to food or were subjected to a twenty-four hour fast before euthanized for tissue harvest. A third group was fasted for twenty-four hours and then allowed to feed *ad libitum* for another four hours before tissue harvest.

### Tissue Triglyceride uptake analysis

TG uptakes in different organs were analyzed as described in (Bartelt et al., 2011). Briefly, the mice were fasted for 24h followed by oral gavage of 100 $\mu$ l olive oil with 10 $\mu$ Ci per mouse of  $^3$ H-triolein. After 2h, blood was removed by perfusion of the carcass with PBS containing 50U/ml heparin. Next, organs were quickly collected and solubilized in Solvable (PerkinElmer, 0.1ml per 10mg tissue). 200 $\mu$ l tissue lysate were then counted in scintillation fluid for radioactivity, and TG uptake was calculated as c.p.m. per gram of tissue.

### HPLC-UV analysis of conjugated bile acids in mouse gallbladder bile

Bile acid (BAs) standards including taurocholic acid (TCA), taurochenodeoxycholic acid (TCDCA), taurodeoxycholic acid (TDCA), tauroolithocholic acid (TLCA) and glycochenodeoxycholic acid (GCDCA) were purchased from Sigma. Taoursodeoxycholic acid (TUDCA) was purchased from Calbiochem. Tauro-alpha/beta-muricholic acids (TMCA) were obtained from Steraloids Inc. In mouse bile, 99.6% of BAs are taurine conjugates and the taurine conjugates of CA and MCA constitute 95% of total BAs in the bile. Thus, we used a simplified HPLC-UV method to determine the relative amount of TCA and TMCA (Alnouti et al., 2008). Mouse gallbladder bile samples were extracted using Oasis-HLB SPE cartridges (Waters). As mouse bile contains very little glycine-conjugated acid (less than 0.1%), we used GCDCA as the internal standard for HPLC-UV analysis. Briefly, 100ul of diluted bile (100-fold in H<sub>2</sub>O) spiked with 20ul of 2.5mM GCDCA was loaded onto 3cc Oasis SPE cartridges (60mg) pre-conditioned with 1ml MeOH and 1ml H<sub>2</sub>O. Bile salt was eluted with 1.8ml MeOH then washed with 2ml H<sub>2</sub>O; the eluate was evaporated under vacuum and resuspended in 100ul 50% MeOH. For analysis of bile acids with HPLC, reverse phase chromatography was performed on an Eclipse Plus C18 (3.0 x 150mm, 3.5mm,

Agilent technologies) at 30°C. The mobile phase consists of two solvents: solvent A (10mM K<sub>2</sub>HPO<sub>4</sub> pH8.14, 10mM Sodium Borate) and solvent B (acetonitrile: methanol: water 20:70:10 v/v). The column was connected to the Agilent 1100 series HPLC (Agilent Technologies) and the flow rate was 0.5ml/min. Absorbance was read at 210nm. Chromatography started with a solvent mixture of 50% solvent A and B. The gradient increased up to 95% solvent B within twenty minutes and reached 100% B after one more minute. 100% B was used for five minutes and then was returned to the initial setting within one minute, followed by equilibration of the column for seven minutes. The method was verified with taurine conjugated bile acid standards listed above and all data were analyzed using the Agilent software, Chem Station Rev A 10.02 (Agilent technologies).

### **Lipoprotein lipase assay**

For analysis of post-heparin lipoprotein lipase (LPL) activity, post-heparin plasma was prepared from mice 15min after i.p. injection of 500U/kg sodium heparin. LPL activities were measured as free fatty acids released from purified human VLDL as previously described (Carballo-Jane et al., 2010; Di Filippo et al., 2014).

In order to evaluate the regulatory activity of mouse plasma on LPL, a LPL assay using purified bovine LPL protein was performed as described (Basu et al., 2011) with modifications. Briefly, a 100ul reaction was set up by adding 0.15M NaCl, 20mM Tris-HCl pH8.0, 0.0125% Zwittergent, 1.5% FA-free BSA, 1:500 dilution of a fluorogenic triglyceride analog (Cell Biolabs) and 0.5ul mouse plasma. The reaction was carried out for 10min at 37°C using 175ng LPL (from Bovine milk, Sigma), and the signal of the fluorescent product was measured in a fluorescence microplate reader (Ex.480 nm/Em.525 nm).

### **Isolation and culture of mouse primary hepatocytes**

Primary hepatocytes were isolated from C57BL/6 mice fed with a normal chow diet. Briefly, mice were anesthetized with Ketamine (100mg/kg) and Xylazine (10mg/kg), and the liver was perfused with Krebs Ringer buffer with glucose at a rate of 5ml/min for eight minutes, followed by continuous perfusion with the same buffer containing collagenase (Liberase TM Research Grade, Roche) for 10 minutes. Hepatocytes were harvested and purified with Percoll. The viability of hepatocytes was examined by trypan blue exclusion. Only cell isolates with viability over 90% were used. Hepatocytes were plated onto collagen-coated plates (1x10<sup>6</sup> cells/well in 6-well plates and 5x10<sup>5</sup> cell per well in 12-well plates) in DMEM (no glucose) supplemented with 5.5mM glucose, 1xGlutaMAX™ and 10% Cosmic Calf Serum (CCS). To knock down TDP-43 in hepatocytes, ON-TARGETplus Mouse TDP-43 siRNA (Thermo Fisher Scientific Inc.) was transfected using RNAiMAX, and a scramble siRNA was used as control.

### **AML12 cell culture and bile treatment**

The AML12 cells (ATCC) were cultured in a 1:1 mixture of Dulbecco's modified Eagle's medium and Ham's F12 medium (Invitrogen) with 10% CCS, ITS (Invitrogen) and dexamethasone (40ng/ml). For treatment of bile acids, 100% confluent AML12 cells were cultured in serum free medium for 48 hours, treated with 100uM CA, MCA or

DMSO as control for 24 hours. RNA were harvested and quantified by real-time PCR analysis.

### **RNA extraction and quantitative real-time PCR analysis**

Total RNA was isolated from liver tissues or cells using Trizol reagent (Invitrogen). After Turbo DNA-free DNase treatment (Ambion), reverse transcription was carried out with SuperScript® III First-Strand Synthesis system (Invitrogen) using 1 µg of RNA. Quantitative real-time RT-PCR was performed on a ViiA™ 7 Real-Time PCR System (Applied Biosystems Inc.) The PCR program was: 2 min 30 s at 95°C for enzyme activation, 40 cycles of 15 s at 95°C, and 1 min at 60°C. Melting curve analysis was performed to confirm the real-time PCR products. All quantitations were normalized to 18S rRNA levels. 18S rRNA levels are in general stable for samples collected under similar conditions, though they may vary across different tissues, so slight variations might be introduced when it is used to normalize tissue-specific expression. Primer sequences used are provided in the Table S1.

### **Immunoblotting**

For Immunoblotting analyses, the cells and tissues were lysed in RIPA buffer (Cell Signaling Technology) containing phosphatase inhibitors (Sigma) and a protease inhibitor cocktail (Roche). The lysate was subjected to SDS-PAGE, transferred to polyvinylidene fluoride (PVDF) membranes, and incubated with the primary antibody followed by the fluorescence conjugated secondary antibody (LI-COR). The bound antibody was visualized using a quantitative fluorescence imaging system (LI-COR). The primary antibodies used are anti-TDP43 (ab41881, Abcam)

For detection of apoproteins and Angptl8 protein levels in mouse plasma, equal amount of plasma from individual mice or pooled plasma of 5-6 mice from the same experimental group was mixed with NuPAGE LDS Sample Buffer and Reducing Agent, heated at 95°C for 10min before loaded to Novex NuPAGE 4–12 % Bis-Tris gels (200V for 30 min in MES buffer), then transferred to PVDF membranes (450mA, 3hr in 0.25X Laemmli buffer, 20% Methanol) for Western Blot analysis. The primary antibodies used are apoC2 (T-12) antibody (SC-19015, Santa Cruz), apoC3 antibody (SC-50378, Santa Cruz), apoC1 antibody (ab20051, Abcam), apoE antibody (SC-6384, Santa Cruz), and Angptl8 antibody (7619, ProSci).

### **References**

- Alnouti, Y., Csanaky, I.L., and Klaassen, C.D. (2008). Quantitative-profiling of bile acids and their conjugates in mouse liver, bile, plasma, and urine using LC-MS/MS. *J Chromatogr B Analyt Technol Biomed Life Sci* 873, 209-217.
- Bartelt, A., Bruns, O.T., Reimer, R., Hohenberg, H., Ittrich, H., Peldschus, K., Kaul, M.G., Tromsdorf, U.I., Weller, H., Waurisch, C., et al. (2011). Brown adipose tissue activity controls triglyceride clearance. *Nature medicine* 17, 200-205.
- Basu, D., Manjur, J., and Jin, W. (2011). Determination of lipoprotein lipase activity using a novel fluorescent lipase assay. *J Lipid Res* 52, 826-832.
- Carballo-Jane, E., Chen, Z., O'Neill, E., Wang, J., Burton, C., Chang, C.H., Chen, X., Eveland, S., Frantz-Wattley, B., Gagen, K., et al. (2010). ApoA-I mimetic peptides

promote pre-beta HDL formation in vivo causing remodeling of HDL and triglyceride accumulation at higher dose. *Bioorg Med Chem* 18, 8669-8678.

Di Filippo, M., Marcais, C., Charriere, S., Marmontel, O., Broyer, M., Delay, M., Merlin, M., Nollace, A., Valero, R., Lagarde, M., et al. (2014). Post-heparin LPL activity measurement using VLDL as a substrate: a new robust method for routine assessment of plasma triglyceride lipolysis defects. *PLoS One* 9, e99721.

Keane, T.M., Goodstadt, L., Danecek, P., White, M.A., Wong, K., Yalcin, B., Heger, A., Agam, A., Slater, G., Goodson, M., et al. (2011). Mouse genomic variation and its effect on phenotypes and gene regulation. *Nature* 477, 289-294.
